# Supplementary material
Source: MDPI journal article supplement (https://www.mdpi.com/1424-8247/14/12/1274)
Supplement: s1 [file s1]

*Supporting Information for*

## **An overview of Bioactive 1,3-oxazole-Containing Alkaloids from Marine Organisms**

**Jinyun Chen**<sup>1</sup>, **Sunyan Lv**<sup>1</sup>, **Jia Liu**<sup>1</sup>, **Yanlei Yu**<sup>2</sup>, **Hong Wang**<sup>1</sup>, **Huawei Zhang**<sup>1,\*</sup>

<sup>1</sup> School of Pharmaceutical Sciences, Zhejiang University of Technology, Hangzhou, 310014, China; chenjinyun07@163.com (J.C.); lvsunyan@163.com (S.L.); jliu3092@163.com (J.L.); hongw@zjut.edu.cn (H.W.)

<sup>2</sup> Collaborative Innovation Center of Green Pharmaceutics of Delta Yangzi Region, Zhejiang University of Technology, Hangzhou 310014, China; yanleiyu@zjut.edu.cn

\* Correspondence: hwzhang@zjut.edu.cn

### **Contents**

|                                                                                                                          |     |
|--------------------------------------------------------------------------------------------------------------------------|-----|
| <b>Table S1</b> Detail information for bioactive 1,3-oxazole-containing alkaloids ( <b>1-285</b> ) from marine organisms | S2  |
| <b>References</b>                                                                                                        | S18 |

**Table S1** Detail information for bioactive 1,3-oxazole-containing alkaloids (1-285) from marine organisms.

| Number | Name                  | Marine Source                                                                                                                   | Biological Activity                                                                                                                                               | Reference |
|--------|-----------------------|---------------------------------------------------------------------------------------------------------------------------------|-------------------------------------------------------------------------------------------------------------------------------------------------------------------|-----------|
| 1      | Almazole A            | Red seaweed of the family <i>Delesseriaceae</i> --                                                                              |                                                                                                                                                                   | [1]       |
| 2      | Almazole B            | from the coasts of Senegal.                                                                                                     | --                                                                                                                                                                |           |
| 3      | Almazole C            |                                                                                                                                 | --                                                                                                                                                                | [2]       |
| 4      | Almazole D            |                                                                                                                                 | Antibacterial against Gram-negative <i>Serratia marcescens</i> and <i>Salmonella typhi</i> XLD.                                                                   | [3]       |
| 5      | Streptochlorin        | Strain <i>Streptomyces</i> sp. 04DH110 isolated from shallow water sediment taken at -1 mand depth of Ayajin Bay (Korea).       | Inhibitory activity against human leukemia cells (IC <sub>50</sub> 1.05 µg/ml) and immortalized hepatocytes derived from normal human liver; antifungal activity. | [4]       |
| 6      | Martefragin A         | Red alga <i>Martensia fragilis</i> , collected off the coast of Uozu, Toyama Prefecture (Japan).                                | Inhibitory activity on NADPH-dependent lipid peroxidation in rat liver microsomes.                                                                                | [5]       |
| 7      | Almazolone            | Red alga of Senegal <i>Haraldiophyllum</i> sp. from--Dakar (Senegal).                                                           |                                                                                                                                                                   | [6]       |
| 8      | Serratiochelin A      | Isolated from a co-culture of <i>Serratia</i> sp. and <i>Shewanella</i> sp.                                                     | Antiproliferative activity on human melanoma cell line and non-malignant lung fibroblasts; antimicrobial effect on <i>Staphylococcus aureus</i> .                 | [7]       |
| 9      | JBIR 34               | A sponge-derived <i>Streptomyces</i> sp.                                                                                        | DPPH radical scavenging activity with an IC <sub>50</sub> value of 1.0 mM.                                                                                        | [8]       |
| 10     | JBIR 35               | Sp080513GE-23, isolated from a marine sponge, <i>Haliclona</i> sp. Which collected from Tateyama city, Chiba Prefecture, Japan. | DPPH radical scavenging activity with an IC <sub>50</sub> value of 2.5 mM.                                                                                        |           |
| 11     | Nigribactin           | Marine bacteria <i>Vibrio nigripulchritudo</i> ,--isolated from marine Galathea.                                                |                                                                                                                                                                   | [9]       |
| 12     | Phorbazole A          | Marine sponge <i>Phorbis aff. clathrata</i> collected--                                                                         |                                                                                                                                                                   | [10]      |
| 13     | Phorbazole B          | off Sodwana Bay (South Africa).                                                                                                 | --                                                                                                                                                                |           |
| 14     | Phorbazole C          |                                                                                                                                 | --                                                                                                                                                                |           |
| 15     | Phorbazole D          |                                                                                                                                 | --                                                                                                                                                                |           |
| 16     | 9-Chloro-phorbazole D | Nudibranch <i>Aldisa andersoni</i> , collected off                                                                              | In vitro growth inhibitory activity against five human cancer cell                                                                                                | [11]      |

|    |                                   |                                                                                                                          |                                                                                                                                                                                                                                                                                                                   |      |
|----|-----------------------------------|--------------------------------------------------------------------------------------------------------------------------|-------------------------------------------------------------------------------------------------------------------------------------------------------------------------------------------------------------------------------------------------------------------------------------------------------------------|------|
| 17 | N1-methyl-phorbazole A            | Muttom coast (India).                                                                                                    | lines (A549; MCF-7; SKMEL-28; Hs683; U373).                                                                                                                                                                                                                                                                       |      |
| 18 | Ariakemicin A                     | <i>Rapidithrix</i> sp. from the muddy land                                                                               | Selectively inhibitory effect on the growth of Gram-positive bacteria                                                                                                                                                                                                                                             |      |
| 19 | Ariakemicin B; $\Delta$ 11-isomer | alongside the Ariake Inland Sea in southwest Japan.                                                                      | ( <i>Brevibacterium</i> sp., <i>Staphylococcus aureus</i> , and <i>Bacillus subtilis</i> ); slight cytotoxicity against A549 human lung cancer cells and BHK baby hamster kidney cells with IC <sub>50</sub> values of 25 and 15 $\mu$ g/mL, respectively.                                                        | [12] |
| 20 | Breitfussin A                     | Marine hydrozoan <i>Thuiaria breitfussi</i> ,--<br>collected from Bjørnøya (Bear island).                                |                                                                                                                                                                                                                                                                                                                   |      |
| 21 | Breitfussin B                     | --                                                                                                                       |                                                                                                                                                                                                                                                                                                                   | [13] |
| 22 | Breitfussin C                     |                                                                                                                          | Cytotoxicity against seven cancer cell lines (MCF-7, MDA-MB-468, and SK-BR-3; breast adenocarcinoma, HT-29; colon adenocarcinoma, MOLT-4 and MV-4-11; leukemia, and A2058; melanoma) and one nonmalignant cell line (MRC-5; lung fibroblasts); an extraordinarily potential inhibitor for PIM1 and DRAK1 kinases. | [14] |
| 23 | Breitfussin D                     | --                                                                                                                       |                                                                                                                                                                                                                                                                                                                   |      |
| 24 | Breitfussin E                     | ---                                                                                                                      |                                                                                                                                                                                                                                                                                                                   |      |
| 25 | Breitfussin F                     | --                                                                                                                       |                                                                                                                                                                                                                                                                                                                   |      |
| 26 | Breitfussin G                     | --                                                                                                                       |                                                                                                                                                                                                                                                                                                                   |      |
| 27 | Breitfussin H                     | --                                                                                                                       |                                                                                                                                                                                                                                                                                                                   |      |
| 28 | Mechercharstatin B                | Strain <i>Thermoactinomyces</i> sp. YM3-251--<br>isolated from sea mud collected at Mecherchar in the Republic of Palau. |                                                                                                                                                                                                                                                                                                                   | [15] |
| 29 | Siphonazole A                     | <i>Herpetosiphon</i> sp. from a mud sample of the                                                                        | Selective cytotoxicity to human breast cancer HTB-129 and acute T                                                                                                                                                                                                                                                 | [16] |

|    |                            |                                                                                                              |                                                                                                                                                                                                                                              |      |
|----|----------------------------|--------------------------------------------------------------------------------------------------------------|----------------------------------------------------------------------------------------------------------------------------------------------------------------------------------------------------------------------------------------------|------|
| 30 | Siphonazole A; 3'-Me ether | intertidal region.                                                                                           | cell leukemia TIB-152.                                                                                                                                                                                                                       |      |
| 31 | Nazumazole A               | Marine sponge <i>Theonella swinhoei</i> , collected at Hachijo Island (Japan).                               | Cytotoxic to P388 cells.                                                                                                                                                                                                                     | [17] |
| 32 | Nazumazole B               |                                                                                                              |                                                                                                                                                                                                                                              |      |
| 33 | Nazumazole C               |                                                                                                              |                                                                                                                                                                                                                                              |      |
| 34 | Nazumazole D               |                                                                                                              | Inhibit chymotrypsin.                                                                                                                                                                                                                        | [18] |
| 35 | Nazumazole E               |                                                                                                              |                                                                                                                                                                                                                                              |      |
| 36 | Nazumazole F               |                                                                                                              |                                                                                                                                                                                                                                              |      |
| 37 | Orbiculamide A             | Marine sponge <i>Theonella</i> sp., collected at Hachijo Island (Japan).                                     | Cytotoxic to P388 murine leukemia cells.                                                                                                                                                                                                     | [19] |
| 38 | Keramamide B               | Marine sponge <i>Theonella</i> sp. collected at Kerama Islands (Japan).                                      | Inhibited the superoxide generation response of the human neutrophils elicited with a chemotactic peptide, <i>N</i> -formyl-Met-Leu-Phe (fMLP).<br>Cytotoxicity against L1210 murine leukemia cells and KB human epidermoid carcinoma cells. | [20] |
| 39 | Keramamide C               |                                                                                                              |                                                                                                                                                                                                                                              |      |
| 40 | Keramamide D               |                                                                                                              |                                                                                                                                                                                                                                              |      |
| 41 | Keramamide E               |                                                                                                              |                                                                                                                                                                                                                                              |      |
| 42 | Keramamide M               |                                                                                                              |                                                                                                                                                                                                                                              |      |
| 43 | Keramamide N               |                                                                                                              |                                                                                                                                                                                                                                              | [22] |
| 44 | Discobahamin A             | Marine sponge <i>Discodermia</i> sp., isolated from a new species of the Bahamian deep water.                | Inhibitor of the growth of <i>Candida albicans</i> .                                                                                                                                                                                         | [23] |
| 45 | Discobahamin B             |                                                                                                              |                                                                                                                                                                                                                                              |      |
| 46 | Bistratamide A             | Ascidian <i>Lissoclinum bistratum</i> , collected at Heron Island Reef on the Great Barrier Reef, Australia. | Cytotoxicity toward human cell lines, MRC5CV1 fibroblasts and T24 bladder carcinoma cells.                                                                                                                                                   | [24] |
| 47 | Bistratamide B             |                                                                                                              |                                                                                                                                                                                                                                              |      |
| 48 | Bistratamide C             | Ascidian <i>Lissoclinum bistratum</i> in the Philippines.                                                    | Depressant effects in the ic. Mouse.                                                                                                                                                                                                         | [25] |
| 49 | Bistratamide D             |                                                                                                              |                                                                                                                                                                                                                                              |      |
| 50 | Bistratamide E             |                                                                                                              |                                                                                                                                                                                                                                              |      |
| 51 | Bistratamide F             |                                                                                                              | Moderately cytotoxic in the HCT-116 cell line assay.<br>Moderately cytotoxic in the HCT-116 cell line assay.<br>Moderate activity against the human colon tumor (HCT-116) cell line.                                                         | [26] |
| 52 | Bistratamide G             |                                                                                                              |                                                                                                                                                                                                                                              |      |
| 53 | Bistratamide H             |                                                                                                              |                                                                                                                                                                                                                                              |      |
| 54 | Bistratamide I             |                                                                                                              | --                                                                                                                                                                                                                                           | [27] |
| 55 | Bistratamide K             |                                                                                                              |                                                                                                                                                                                                                                              |      |
| 56 | Bistratamide L             |                                                                                                              |                                                                                                                                                                                                                                              |      |

|    |                   |                                                                                                                                                                                     |                                                                                                                                     |
|----|-------------------|-------------------------------------------------------------------------------------------------------------------------------------------------------------------------------------|-------------------------------------------------------------------------------------------------------------------------------------|
| 57 | Bistratamide M    | Ascidian <i>Lissoclinum bistratum</i> collected in                                                                                                                                  | Moderate cytotoxicity against four human tumor cell lines with GI <sub>50</sub>                                                     |
| 58 | Bistratamide N    | Raja Ampat (Papua Bar, Indonesia).                                                                                                                                                  | values in the micromolar range.                                                                                                     |
| 59 | Westiellamide     | A terrestrial blue-green alga <i>Westiellopsis prolifera</i> , collected from a mud sample on the island of Oahu, Hawaii.                                                           | Cytotoxic against KB and LoVo cell lines. [28]                                                                                      |
| 60 | Dendroamide A     | A terrestrial blue-green alga                                                                                                                                                       | Multidrug-resistance reversing activity.                                                                                            |
| 61 | Dendroamide B     | (cyanobacterium) <i>Stigonema dendroideum</i> --                                                                                                                                    |                                                                                                                                     |
| 62 | Dendroamide C     | Fremy, isolated from a rock sample collected--at Wainapanapa, Maui.                                                                                                                 | [29]                                                                                                                                |
| 63 | Didmolamide A     | Ascidian <i>Didemnum molle</i> , collected in                                                                                                                                       | Mildly cytotoxic against tumor cell lines (A549, HT29, and MEL28). [30]                                                             |
| 64 | Dolastatin E      | Sea hare <i>Dolabella auricularia</i> in Japanese.                                                                                                                                  | Cytotoxic activity against HeLa S <sub>3</sub> cells. [31]                                                                          |
| 65 | Dolastatin I      |                                                                                                                                                                                     | Cytotoxicity against HeLa S <sub>3</sub> cells. [32]                                                                                |
| 66 | Leucamide A       | Marine sponge <i>Leucetta microraphis</i> collected in Australian.                                                                                                                  | Moderately cytotoxic toward several tumor cell lines. [33]                                                                          |
| 67 | Comoramide A      | Ascidian <i>Didemnum molle</i> , collected at                                                                                                                                       | Mild cytotoxicity against several tumor cells (A549, HT29 and MEL-28). [34]                                                         |
| 68 | Venturamide A     | Cyanobacterium <i>Oscillatoria</i> sp., collected from Buenaventura Bay.                                                                                                            | Strong <i>in vitro</i> activity against <i>Plasmodium falciparum</i> (8.2 µM); mild cytotoxicity to mammalian Vero cells (86 µM).   |
| 69 | Venturamide B     |                                                                                                                                                                                     | Strong antimalarial activity against <i>Plasmodium falciparum</i> (5.6 µM); mild cytotoxicity to mammalian Vero cells (56 µM). [35] |
| 70 | Tenuencyclamide A | Cyanobacterium <i>Nostoc spongiaeforme</i> var.                                                                                                                                     | Inhibit sea urchin embryos with ED <sub>100</sub> of 10.8 µM.                                                                       |
| 71 | Tenuencyclamide B | <i>Tenue</i> , isolated from a lithophytic sample--                                                                                                                                 |                                                                                                                                     |
| 72 | Tenuencyclamide C | collected in the Volcani Center, Bet Dagan,                                                                                                                                         | Inhibit sea urchin embryos with ED <sub>100</sub> of 9.0 µM. [36]                                                                   |
| 73 | Tenuencyclamide D | Israel.                                                                                                                                                                             | Inhibit sea urchin embryos with ED <sub>100</sub> of 19.1 µM.                                                                       |
| 74 | Microcyclamide    | Cyanobacterium <i>Microcystis aeruginosa</i> (NIES-298), obtained from the NIES collection (Microbial Culture Collection, the National Institute for Environmental Studies, Japan). | Moderate cytotoxicity against P388 murine leukemia cells. [37]                                                                      |

|    |                                       |                                                                                                                                            |                                                                                                                                                       |      |
|----|---------------------------------------|--------------------------------------------------------------------------------------------------------------------------------------------|-------------------------------------------------------------------------------------------------------------------------------------------------------|------|
| 75 | Microcyclamide GL628                  | A waterbloom of the cyanobacterium                                                                                                         | Inhibit one solid tumor (A549-lung) and one leukemia (Molt-4) cell                                                                                    |      |
| 76 | Microcyclamide GL614C                 | <i>Microcystis</i> sp., isolated from Gilboalines.                                                                                         |                                                                                                                                                       |      |
| 77 | Microcyclamide GL582                  | reservoir, Valley of Armageddon, Israel.                                                                                                   |                                                                                                                                                       |      |
| 78 | Microcyclamide GL614A                 |                                                                                                                                            |                                                                                                                                                       | [38] |
| 79 | Microcyclamide GL614B                 |                                                                                                                                            |                                                                                                                                                       |      |
| 80 | Microcyclamide GL546A                 |                                                                                                                                            |                                                                                                                                                       |      |
| 81 | Microcyclamide GL546B                 |                                                                                                                                            |                                                                                                                                                       |      |
| 82 | Cyanothecamide C                      | Marine cyanobacteria <i>Cyanothece</i> sp. PCC--7425, obtained from the Pasteur culture collection of cyanobacteria (Paris).               |                                                                                                                                                       | [39] |
| 83 | Cyclodidemnamide                      | Marine ascidian <i>Didemnum molly</i> , collected in the Philippine Islands.                                                               | Weakly cytotoxic toward human colon tumor cells. HCT-116, <i>in vitro</i> , with an ED <sub>50</sub> of 16 µg/mL.                                     | [40] |
| 84 | <i>cis, cis</i> -ceratospongamide     | The Indonesian red alga <i>Ceratodictyon</i>                                                                                               | --                                                                                                                                                    |      |
| 85 | <i>trans, trans</i> -ceratospongamide | <i>spongiosum</i> and symbiotic sponge <i>Sigmadocia symbiotica</i> .                                                                      | Anti-inflammation; inhibit the expression of a human-sPLA2 promoter-based reporter by 90%.                                                            | [41] |
| 86 | Lissoclinamide 1                      | Tunicate <i>Lissoclinum patella</i> , collected in Iwayama Bay (near the Continental Hotel dock), Korrör Island, Western Caroline Islands. | Borderline cytotoxicity in L1210 tissue culture assay.                                                                                                |      |
| 87 | Lissoclinamide 2                      |                                                                                                                                            |                                                                                                                                                       |      |
| 88 | Lissoclinamide 3                      |                                                                                                                                            |                                                                                                                                                       | [42] |
| 89 | Lissoclinamide 4                      | Ascidian <i>Lissoclinum patella</i> , collected in Australia.                                                                              | Cytotoxicity against human fibroblast, bladder carcinoma cell lines and normal lymphocytes; Marginal cytotoxicity against lymphocytic leukemia cells. |      |
| 90 | Lissoclinamide 5                      |                                                                                                                                            |                                                                                                                                                       | [43] |
| 91 | Lissoclinamide 6                      |                                                                                                                                            | Marginal cytotoxicity against lymphocytic leukemia cells with ED <sub>50</sub> of 6.9 µg/mL.                                                          |      |
| 92 | Lissoclinamide 7                      |                                                                                                                                            | Cytotoxicity against human fibroblast, bladder carcinoma cell lines and normal lymphocytes.                                                           |      |
| 93 | Lissoclinamide 8                      |                                                                                                                                            |                                                                                                                                                       | [44] |
| 94 | Lissoclinamide 9                      | An Indonesian collection of the ascidian--                                                                                                 |                                                                                                                                                       |      |
| 95 | Lissoclinamide 10                     | <i>Lissoclinum Patella</i> .                                                                                                               | --                                                                                                                                                    | [45] |
| 96 | Ulicyclamide                          | Ascidian <i>Lissoclinum patella</i> , collected from Palau, Western Caroline Islands.                                                      | Cytotoxic against cultured L1210 mouse leukemia cells.                                                                                                | [46] |

|     |                          |                                                                                                                                                                                                   |      |
|-----|--------------------------|---------------------------------------------------------------------------------------------------------------------------------------------------------------------------------------------------|------|
| 97  | Sanguinamide B           | Nudibranch <i>Hexabranchus sanguineus</i> , Disrupted the twitching activity of <i>Pseudomonas aeruginosa</i> .<br>collected from the Indo-Pacific.                                               | [47] |
| 98  | Myriastramide A          | A Philippines marine sponge <i>Myriastraclos</i> .                                                                                                                                                | [48] |
| 99  | Myriastramide B          |                                                                                                                                                                                                   |      |
| 100 | Myriastramide C          |                                                                                                                                                                                                   |      |
| 101 | Haliclona A              | A Palauan marine sponge <i>Haliclona</i> sp.                                                                                                                                                      | [49] |
| 102 | Haliclona B              | --                                                                                                                                                                                                |      |
| 103 | Haliclona C              | Repellent activity against the blue mussel <i>Mytilus edulis galloprovincialis</i> .                                                                                                              | [50] |
| 104 | Haliclona D              |                                                                                                                                                                                                   |      |
| 105 | Haliclona E              |                                                                                                                                                                                                   |      |
| 106 | Perthamide J             | Marine sponge <i>T. swinhoei</i> , collected at a depth of 22 m, on an isolated reef off the western coast of Malaita Island, Solomon Islands.                                                    | [51] |
| 107 | Perthamide K             |                                                                                                                                                                                                   |      |
| 108 | Ascidacyclamide          | Ascidian, collected from Rodda Reef, Queensland, Australia.                                                                                                                                       | [52] |
| 109 | Prepatellamide A         | Ascidian <i>Lissoclinum patella</i> , collected in Indonesia.                                                                                                                                     | [53] |
| 110 | Prepatellamide B formate | Ascidian <i>Lissoclinum patella</i> , collected in Palau.                                                                                                                                         | [54] |
| 111 | Patellamide C            | Marine Tunicate <i>Lissoclinum patella</i> , collected from Palau of the Western Caroline Islands.                                                                                                | [55] |
| 112 | Patellamide G            | Ascidian <i>Lissoclinum patella</i> , collected in Pohnpei, Federated States of Micronesia.                                                                                                       | [56] |
| 113 | Patellamide A            | Marine Tunicate <i>Lissoclinum Patella</i> , collected from Palau of the Western Caroline Islands.                                                                                                | [57] |
| 114 | Patellamide B            | Modest general cytotoxicity in the NCI's 60 human tumor cell line panel (average LC <sub>50</sub> values of 48 $\mu$ M ); <i>in vitro</i> modulation of multidrug resistance in CEM/VBL100 cells. | [55] |
| 115 | Patellamide D            | Marine tunicate <i>Lissoclinum patella</i> .                                                                                                                                                      | [58] |

|     |                    |                                                                                                                                                                                                                                                                                                    |      |
|-----|--------------------|----------------------------------------------------------------------------------------------------------------------------------------------------------------------------------------------------------------------------------------------------------------------------------------------------|------|
| 116 | Patellamide E      | Ascidian <i>Lissoclinum patella</i> , collected at Mildly cytotoxic against human colon tumor cells <i>in vitro</i> .<br>Pulau Salu, Singapore.                                                                                                                                                    | [59] |
| 117 | Patellamide F      | The colonial ascidian <i>Lissoclinum patella</i> , Modest general cytotoxicity in the NCI's 60 human tumor cell line collected around Monte Bello Island, panel (average LC <sub>50</sub> values of 13 $\mu$ M).<br>northwest Australia.                                                           | [60] |
| 118 | Kocurin            | Marine-Derived Bacterium <i>Kocuria palustris</i> An excellent inhibitor of Methicillin-resistant <i>Staphylococcus aureus</i> collected in Florida Keys, USA. (MRSA).                                                                                                                             | [42] |
| 119 | Mechercharstatin A | Marine-derived <i>Thermoactinomyces</i> sp. YM3-Strong antitumor activity.<br>251, isolated from sea mud collected at Mecherchar in the Republic of Palau (North Pacific Ocean).                                                                                                                   | [15] |
| 120 | Urukthapelstatin A | Marine-derived <i>Mechercharimyces asporophorigenens</i> YM11-542, isolated from a sediment sample collected from a marine lake in the northern part of Urukthapel Island in the Republic of Palau.                                                                                                | [61] |
| 121 | TP-1161            | Marine <i>Nocardiopsis</i> sp., produced by a Strong antibacterial activity.<br>marine sediment-derived <i>Nocardiopsis</i> .                                                                                                                                                                      | [62] |
| 122 | Wewakazole         | Coral <i>Lyngbya majuscula</i> , collected from a Inhibited cancer cell proliferation in a dose-dependent manner.<br>shoreline growth of coral (< 1.5 m depth) in Wewak Bay, Papua New Guinea.                                                                                                     | [63] |
| 123 | Wewakazole B       | Cyanobacterium <i>Moorea producents</i> collected Cytotoxic activity toward human MCF7 breast cancer cells (IC <sub>50</sub> = 0.58 $\mu$ M); human H460 lung cancer cells (IC <sub>50</sub> = 1.0 $\mu$ M).<br>in the Red Sea.                                                                    | [64] |
| 124 | Diazonamide A      | Ascidian <i>Diazona chinensis</i> , collected from Potent <i>in vitro</i> activity against HCT-116 human colon carcinoma and the ceilings of small caves along the B-16 murine melanoma cancer cell lines, with IC <sub>50</sub> values less than 15<br>northwest coast of Siquijor Island, ng/mL. | [65] |
| 125 | Diazonamide B      | Philippines. --                                                                                                                                                                                                                                                                                    |      |



|     |                     |                                                      |                                                                       |      |
|-----|---------------------|------------------------------------------------------|-----------------------------------------------------------------------|------|
| 126 | Diazonamide C       | Marine ascidian <i>Diazona</i> sp. collected in      | Moderate cytotoxicity against a panel of three human tumor cell       | [66] |
| 127 | Diazonamide D       | Indonesia.                                           | lines, including lung (A549), colon (HT29), and breast (MDA-MB-       |      |
| 128 | Diazonamide E       |                                                      | 231).                                                                 |      |
| 129 | Ulithiacyclamide    | Ascidian <i>Lissoclinum patella</i> , collected from | IC <sub>50</sub> 's of 35 ng/ml against the KB cell line.             | [46] |
|     |                     | Palau, Western Caroline Islands.                     |                                                                       |      |
| 130 | Ulithiacyclamide B  | <i>Lissoclinum patella</i> (SG-5 1) was collected    | Exhibits an IC <sub>50</sub> 's of 17 ng/ml against the KB cell line. | [67] |
|     |                     | from dead coral outside and north of Palikir         |                                                                       |      |
|     |                     | Pass, Pohnpei at a depth of 2040 ft.                 |                                                                       |      |
| 131 | Ulithiacyclamide F  | Ascidian <i>Lissoclinum patella</i> , collected in   | Cytotoxicity against vinblastine-resistat CCRF-CEM human              | [56] |
|     |                     | Australia.                                           | leukemic lymphoblasts.                                                |      |
| 132 | Ulithiacyclamide G  | Ascidian <i>Lissoclinum patella</i> , collected in   | Cytotoxicity against vinblastine-resistat CCRF-CEM human              |      |
|     |                     | Pohnpei, Federated States of Micronesia.             | leukemic lymphoblasts.                                                |      |
| 133 | Taumycin A          | A Madagasca marine sponge <i>Fascaplysinopsis</i>    | Toxic to brine shrimp larvae; inhibited growth of the human UT-7      | [68] |
|     |                     | sp.                                                  | leukemic cell line.                                                   |      |
|     |                     |                                                      |                                                                       |      |
| 134 | Discokiolide A      | Marine sponge <i>Discodermia kiiensis</i> .          | Cytotoxic activities against P388, p388/ADM, B16-BL6, Lewis, Lu-99,   | [69] |
| 135 | Discokiolide B      |                                                      | HT-29 and CCD-19Lu.                                                   |      |
| 136 | Discokiolide C      |                                                      |                                                                       |      |
| 137 | Discokiolide D      |                                                      |                                                                       |      |
| 138 | Phorboxazole A      | The Indian Ocean marine sponge <i>Phorbas</i> sp.    | High cytotoxic activity and induce cell growth inhibition (GI) in     | [70] |
| 139 | Phorboxazole B      |                                                      | leukemia.                                                             |      |
| 140 | Hemi-phorboxazole A |                                                      | A potent Michael acceptor.                                            | [71] |
| 141 | Leiodolide A        | Marine sponge <i>Leiodermatium</i> , collected at a  | Cytotoxic effects on human colon cancer HCT-116, HL-60, NCI-H52       | [72] |
| 142 | Leiodolide B        | depth of 720 feet near Uchelbeluu Reef in            | and OVCAR-3 cell lines.                                               |      |
|     |                     | Palau.                                               |                                                                       |      |
| 143 | Salarin C           | Madagascan marine sponge <i>Fascaplysinopsis</i>     | Inhibit cell proliferation of human leukeamic cell lines UT-7 and     | [73] |
|     |                     | sp. collected in Salary Bay, ca. 100 km north        | K562 and the murine pro-B cell line Ba/F3.                            |      |
|     |                     | of Tulear.                                           |                                                                       |      |
| 144 | Salarin F           |                                                      | Cytotoxicity against K562 and UT-7 human leukemia cells.              | [74] |
| 145 | Salarin I           |                                                      |                                                                       |      |
| 146 | Theonezolid A       | An Okinawan marine sponge <i>Theonella</i> sp.       | Cytotoxicity against murine lymphoma L1210 and human                  | [75] |
| 147 | Theonezolid B       |                                                      | epidermoid carcinoma KB cells <i>in vitro</i> .                       | [76] |

|     |                             |                                                        |                                                                                                                                                                                        |      |
|-----|-----------------------------|--------------------------------------------------------|----------------------------------------------------------------------------------------------------------------------------------------------------------------------------------------|------|
| 148 | Theonezolid C               |                                                        |                                                                                                                                                                                        |      |
| 149 | Kabiramide I                | A Thai marine sponge <i>Pachastrissa nux.</i>          | Moderate antiplasmodial activity against <i>Plasmodium falciparum</i> K1.                                                                                                              | [77] |
| 150 | Halishigamide B             | An Okinawan marine sponge <i>Halichondria</i> sp.      | Weak cytotoxicity against L1210 (IC <sub>50</sub> 4.4 µg/mL) and KB cells (IC <sub>50</sub> 7.5 µg/mL) and modest antifungal activity against <i>T. mentagrophytes</i> (MIC 25 µg/mL). | [78] |
| 151 | Mycalolide D                | An Australian stony coral <i>Tubastrea faulkneri</i> . | Modest cytotoxicity against the NCI's 60-human tumor cell line panel.                                                                                                                  | [79] |
| 152 | Ulapualide A                | Nudibranch <i>Hexabranhus sanguineus</i> eggs          | Inhibit L1210 leukemia cell proliferation with IC <sub>50</sub> 0.01 - 0.03 µg/mL                                                                                                      | [80] |
| 153 | Ulapualide B                | from the west shore of Oahu (Electric Beach).          | and antifungi activity against <i>Candida albicans</i> .                                                                                                                               |      |
| 154 | Ulapualide C                |                                                        | Submicromolar cytotoxicity against select NCI cell lines (768-0, DU-145, MDA-MB-231, and A549) with the most potent activity against MDA-MB-231 cells (IC <sub>50</sub> 0.58 µM).      |      |
| 155 | Ulapualide D                |                                                        | Antitumor.                                                                                                                                                                             | [81] |
| 156 | Ulapualide E                |                                                        | Antitumor.                                                                                                                                                                             |      |
| 157 | Miuramide A                 | Marine sponge <i>Mycale</i> sp., collected off         | Cytotoxicity against 3Y1 cells.                                                                                                                                                        | [82] |
| 158 | Miuramide B                 | Miura Peninsula.                                       |                                                                                                                                                                                        |      |
| 159 | Mycalolide A                | Marine sponge <i>Mycale</i> sp., collected from        | Antifungal effects on various pathogenic fungi and has cytotoxicity                                                                                                                    | [83] |
| 160 | Mycalolide B                | shallow waters (-2 - -5 m) in Gokasho Bay of           | on B-16 melanoma cells with IC <sub>50</sub> of 0.5 - 1.0 ng/mL.                                                                                                                       |      |
| 161 | Mycalolide C                | the Kii Peninsula.                                     |                                                                                                                                                                                        |      |
| 162 | 38-hydroxymycalolide B      | Marine sponge <i>Mycale magellanica</i> , collected    | Cytotoxic against L1210 cells.                                                                                                                                                         | [84] |
| 163 | 30-hydroxymycalolide A      | at a depth of 15 m off Kumomi on the Izu               |                                                                                                                                                                                        |      |
| 164 | 32-hydroxymycalolide A      | Peninsula.                                             |                                                                                                                                                                                        |      |
| 165 | 30,32-dihydroxymycalolide A | Marine sponge <i>Mycale izuensis</i> , collected in    | Cytotoxic against HeLa cells with an IC <sub>50</sub> value of 2.6 ng/mL.                                                                                                              | [85] |
|     |                             | the Amakusa Islands 1700 km southwest of Tokyo.        |                                                                                                                                                                                        |      |
| 166 | Halichondramide             | A Pacific marine sponge <i>Halichondria</i> sp.        | Significant activity against <i>Candida albicans</i> .                                                                                                                                 | [86] |
| 167 | iso-halichondramide         | Marine sponge <i>Halichondria</i> , from Palau,        | Antifungal activity and inhibit cell division in the fertilized sea urchin egg assay.                                                                                                  | [87] |
| 168 | (19Z)-halichondramide       | Marine sponge <i>Chondrosia corticata</i> , collected  | Significant cytotoxicity toward the human leukemia cell line K562.                                                                                                                     | [88] |
|     |                             | from Guam.                                             |                                                                                                                                                                                        |      |

|     |                                    |                                                                                                                                      |                                                                                                                                                                                                                                             |      |
|-----|------------------------------------|--------------------------------------------------------------------------------------------------------------------------------------|---------------------------------------------------------------------------------------------------------------------------------------------------------------------------------------------------------------------------------------------|------|
| 169 | Dihydrohalichondramid              | Nudibranch <i>Hexabranchnus sanguineus</i> , from Kwajalein Atoll, Marshall Islands.                                                 | Inhibited L1210 leukemia cell proliferation.                                                                                                                                                                                                | [87] |
| 170 | 33-Methyltetrahydrohalichondramide | Nudibranch <i>Hexabranchnus sanguineus</i> , collected from the Indo-Pacific.                                                        | Antifungal activity.                                                                                                                                                                                                                        | [47] |
| 171 | Jaspisamide A                      | Marine sponge <i>Jaspis</i> sp., collected by scuba off Ishigaki Island, Okinawa.                                                    | <i>In vitro</i> cytotoxicity against L1210 murine leukemia cells and KB human epidermoid carcinoma cells.                                                                                                                                   | [89] |
| 172 | Jaspisamide B                      |                                                                                                                                      |                                                                                                                                                                                                                                             |      |
| 173 | Jaspisamide C                      |                                                                                                                                      |                                                                                                                                                                                                                                             |      |
| 174 | Halishigamide A                    | An Okinawan marine sponge <i>Halichondria</i> sp.                                                                                    | Potent cytotoxic activity against murine lymphoma L1210 and human epidermoid carcinoma KB cells (IC <sub>50</sub> 0.0036 and 0.012 µg/mL, respectively) and antifungal activity against <i>Trichophyton mentagrophytes</i> (MIC 0.1 µg/mL). | [78] |
| 175 | Neohalichondramide                 | Marine sponge <i>Chondrosia corticata</i> , collected from Guam.                                                                     | Exhibited significant cytotoxicity toward the human leukemia cell line K562.                                                                                                                                                                | [88] |
| 176 | Thiomycalolide A                   | Marine sponge <i>Mycale</i> sp., collected off the Kii Peninsula, 330 km southwest of Tokyo.                                         | Highly cytotoxic against P388 murine leukemia cells.                                                                                                                                                                                        | [90] |
| 177 | Thiomycalolide B                   |                                                                                                                                      |                                                                                                                                                                                                                                             |      |
| 178 | Halichondramide acid               | Marine sponge <i>Halichondria</i> , from Palau,-- Western Caroline Islands.                                                          |                                                                                                                                                                                                                                             | [87] |
| 179 | Mycalolide E                       | An Australian stony coral <i>Tubastrea faulkneri</i> .                                                                               | Modest general cytotoxicity against the NCI's 60-human tumor cell line panel.                                                                                                                                                               | [83] |
| 180 | Kabiramide A                       | <i>Henabranchnus</i> egg masses, collected at Kabira Bay, Ishigaki Island of the Ryukyus, and Hachijo Island of the Izu Archipelago. | Strongly active in the sea urchin egg assay; cytotoxic against L1210 cells.                                                                                                                                                                 | [90] |
| 181 | Kabiramide D; 3-Carbamoyl          | Nudibranch egg masses, collected at Kabira Bay in Ishigaki-jima Island of the Ryukyus.                                               | Marked antifungal activity.                                                                                                                                                                                                                 | [91] |
| 182 | Kabiramide E                       | <i>Henabranchnus</i> egg masses, collected at Kabira Bay, Ishigaki Island of the Ryukyus, and Hachijo Island of the Izu Archipelago. | Strongly active in the sea urchin egg assay; cytotoxic against L1210 cells.                                                                                                                                                                 | [90] |

|     |                                    |                                                                                                            |                                                                                                                                                                                                                    |      |
|-----|------------------------------------|------------------------------------------------------------------------------------------------------------|--------------------------------------------------------------------------------------------------------------------------------------------------------------------------------------------------------------------|------|
| 183 | Tetrahydrohalichondramide          | Nudibranch <i>Hexabranhus sanguineus</i> , from Kwajalein Atoll, Marshall Islands.                         | Antifungal activity; inhibit cell division in the fertilized sea urchin egg assay.                                                                                                                                 | [87] |
| 184 | 9-O-desmethylnudibramide B         | Nudibranch <i>Hexabranhus sanguineus</i> , collected from the Indo-Pacific.                                | Antifungal activity.                                                                                                                                                                                               | [47] |
| 185 | Kabiramide B                       | Marine sponge <i>Pachastrissa nux</i> , collected from several other locations in the Gulf of Thailand.    | Strong antimalarial and cytotoxic activities.                                                                                                                                                                      | [92] |
| 186 | Kabiramide C                       |                                                                                                            |                                                                                                                                                                                                                    |      |
| 187 | Kabiramide D                       |                                                                                                            |                                                                                                                                                                                                                    |      |
| 188 | Kabiramide F                       | A Thai marine sponge <i>Pachastrissa nux</i> .                                                             | Cytotoxic against L1210 cells (IC <sub>50</sub> 0.02 µg/mL).                                                                                                                                                       | [77] |
| 189 | Kabiramide G                       | Marine sponge <i>Pachastrissa nux</i> , collected from several other locations in the Gulf of Thailand.    | Moderate to strong antimalarial; cytotoxic activities.                                                                                                                                                             | [92] |
| 190 | Kabiramide J                       |                                                                                                            |                                                                                                                                                                                                                    |      |
| 191 | Kabiramide K                       |                                                                                                            |                                                                                                                                                                                                                    |      |
| 192 | Kabiramide L                       |                                                                                                            | Moderate antiplasmodial activity against <i>Plasmodium falciparum</i> K1.                                                                                                                                          | [93] |
| 193 | Neopeltolide                       | A deep-water sponge of the family <i>Neopeltidae</i> , collected off the north Jamaican coast.             | Inhibitory activity against <i>C. albicans</i> ; <i>in vitro</i> inhibit the proliferation of the A-549 human lung adenocarcinoma, the NCI-ADR-RES human ovarian sarcoma, and the P388 murine leukemia cell lines. | [94] |
| 194 | Leucascandrolide A                 | Marine sponge <i>Leucascandra caveolata</i> , collected along the east coasts of New Caledonia, Coral Sea. | A strong cytotoxic activity on KB cells <i>in vitro</i> ; inhibitory activity against <i>C. albicans</i> .                                                                                                         | [95] |
| 195 | Enigmazole A                       | Marine sponge <i>Cinachyrella enigmatica</i> , isolated from a Papua New Guinea.                           | Cytotoxic to tumor NCI 60-cell line.                                                                                                                                                                               |      |
| 196 | 15-O-methylenigmazole A            |                                                                                                            | --                                                                                                                                                                                                                 | [96] |
| 197 | 13-hydroxy-15-O-methylenigmazole A |                                                                                                            | --                                                                                                                                                                                                                 |      |
| 198 | Calyculin A                        | Marine sponge <i>Discodermia calyx</i> , collected in the Gulf of Sagami at a depth of 5-15 m.             | Significant activity in the starfish <i>Asterina pectinifera</i> and sea urchin <i>Hemicentrotus pulcherrimus</i> ; highly cytotoxic against L1210 leukemia cells.                                                 | [97] |
| 199 | Des-N-methyl calyculin A           | Marine sponge <i>Discodermia calyx</i> , collected by SCUBA at depths of 15 - 20 m off the Izu Peninsula.  | Inhibited protein phosphatase 2A with an IC <sub>50</sub> value of 49 nM.                                                                                                                                          | [98] |

|     |                        |                                                                                                                 |                                                                                 |       |
|-----|------------------------|-----------------------------------------------------------------------------------------------------------------|---------------------------------------------------------------------------------|-------|
| 200 | Calyculin B            | Marine sponge <i>Discodermia calyx</i> , collected in                                                           | Significant activity in the starfish <i>Asterina pectinifera</i> and sea urchin |       |
| 201 | Calyculin C            | the Gulf of Sagami at a depth of 5 - 15 m.                                                                      | <i>Hemicentrotus pulcherrimus</i> ; highly cytotoxic against L1210 leukemia     | [99]  |
| 202 | Calyculin D            |                                                                                                                 | cells.                                                                          |       |
| 203 | Calyculin E            |                                                                                                                 | Potent inhibitors of protein phosphatases 1 and 2A: effective doses             |       |
| 204 | Calyculin F            |                                                                                                                 | for 50% inhibition of protein phosphatases 2A activity for these                | [100] |
| 205 | Calyculin G            |                                                                                                                 | calyculins were 2.7 - 6.0 nM.                                                   |       |
| 206 | Calyculin H            |                                                                                                                 |                                                                                 |       |
| 207 | Dephosphonocalyculin A | Marine sponge <i>Discodermia calyx</i> , collected by                                                           | Inhibits protein phosphatases 1 and 2A with IC <sub>50</sub> values of 3.0 and  | [101] |
|     |                        | SCUBA off the Izu Peninsula.                                                                                    | 8.2 nM, respectively.                                                           |       |
| 208 | Calyculinamide A       | Marine sponge <i>Lamellomorpha strongylata</i> , Inhibited protein phosphatase 2A.                              |                                                                                 |       |
|     |                        | collected by benthic dredging at -80 to -100                                                                    |                                                                                 | [102] |
|     |                        | m along the top of the Mernoo Bank, within                                                                      |                                                                                 |       |
|     |                        | the Chatham Rise convergence zone.                                                                              |                                                                                 |       |
| 209 | Calyculinamide F       | Marine sponge <i>Discodermia calyx</i> , collected                                                              | Inhibited protein phosphatase 2A.                                               |       |
|     |                        | by SCUBA at depths of 15 - 20 m off the Izu                                                                     |                                                                                 | [98]  |
|     |                        | Peninsula.                                                                                                      |                                                                                 |       |
| 210 | Calyculinamide B       | Marine sponge <i>Lamellomorpha strongylata</i> , A potent cell-growth inhibitor.                                |                                                                                 |       |
|     |                        | collected by benthic dredging at -80 to -100                                                                    |                                                                                 | [102] |
|     |                        | m along the top of the Mernoo Bank, within                                                                      |                                                                                 |       |
|     |                        | the Chatham Rise convergence zone.                                                                              |                                                                                 |       |
| 211 | Clavosine A            | Marine sponge <i>Myriastrra clavosa</i> , collected in                                                          | Potent cytotoxic in the National Cancer Institute's screening panel of          |       |
| 212 | Clavosine B            | 1993 from Chuuk, Federated States of                                                                            | 60 tumor cell lines; potent inhibitors of the type 1 and 2A                     |       |
|     |                        | Micronesia.                                                                                                     | serine/threonine protein phosphatases.                                          | [103] |
| 213 | Clavosine C            | --                                                                                                              |                                                                                 |       |
| 214 | Geometricin A          | Marine sponge <i>Luffariella geometrica</i> , Moderately cytotoxic activity to tumor cell lines HM02 and HEPG2; |                                                                                 |       |
|     |                        | collected at Heron Island's, Wistari Reef,                                                                      | antialgal activity.                                                             | [104] |
|     |                        | Australia.                                                                                                      |                                                                                 |       |
| 215 | Swinhoieamide A        | Marine sponge <i>Theonella swinhoei</i> , collected                                                             | Insecticidal activity toward neonate larvae of the polyphagous pest             |       |
|     |                        | by diving at a depth of 50 m near the coast of                                                                  | insect <i>Spodoptera littoralis</i> when incorporated in an artificial diet     | [105] |
|     |                        | the Karkar Island, Papua New Guinea.                                                                            | offered to the larvae in a chronic feeding bioassay (ED <sub>50</sub> 2.11 ppm, |       |

|     |                                                                         |                                                                                                                                                  |                                                                                                                                                                                                              |       |
|-----|-------------------------------------------------------------------------|--------------------------------------------------------------------------------------------------------------------------------------------------|--------------------------------------------------------------------------------------------------------------------------------------------------------------------------------------------------------------|-------|
|     |                                                                         |                                                                                                                                                  | LD <sub>50</sub> 2.98 ppm; inhibitory activity against <i>Candida albicans</i> and <i>Aspergillus fumigatus</i> (MIC 1.2 and 1.0 µg/mL, respectively).                                                       |       |
| 216 | Calyculin J                                                             | Marine sponge <i>Discodermia calyx</i> , collected by SCUBA at depths of 15 - 20 m off the Izu Peninsula.                                        | Inhibited protein phosphatase 2A.                                                                                                                                                                            | [98]  |
| 217 | Inthomycin B                                                            | <i>Streptomyces</i> sp. YB104, obtained from a deep-sea sediment sample collected from the South Atlantic Ocean at (19.57 °S, 11.97°W; -2699 m). | Antimicrobial activity.                                                                                                                                                                                      | [106] |
| 218 | seco-halichondramide                                                    | Marine sponge <i>Chondrosia corticata</i> , collected from Guam.                                                                                 | Weak cytotoxicity toward the human leukemia cell line K562.                                                                                                                                                  | [88]  |
| 219 | Halishigamide C                                                         | An Okinawan marine sponge <i>Halichondria</i> sp.                                                                                                | Weak cytotoxicity against L1210 (IC <sub>50</sub> 5.2 and 1.1 µg/mL ) and KB cells (IC <sub>50</sub> 6.5 and 1.8 µg/mL); modest antifungal activity against <i>T. mentagrophytes</i> (MIC 25 and 6.5 µg/mL). | [78]  |
| 220 | Halishigamide D                                                         |                                                                                                                                                  |                                                                                                                                                                                                              |       |
| 221 | Kabiramide H                                                            | A Thai marine sponge <i>Pachastrissa nux</i> .                                                                                                   | Cytotoxic.                                                                                                                                                                                                   | [77]  |
| 222 | Hennoxazole A                                                           | Marine sponge <i>Polyfibrospongia</i> sp., collected from Agarihennazaki on the island of Miyako, Okinawa, Japan.                                | Antiviral; active against herpes simplex virus type 1 (IC <sub>50</sub> 0.6 µg/mL); peripheral analgesic activity.                                                                                           |       |
| 223 | Hennoxazole B                                                           |                                                                                                                                                  | Antiviral activity.                                                                                                                                                                                          | [107] |
| 224 | Hennoxazole C                                                           |                                                                                                                                                  |                                                                                                                                                                                                              |       |
| 225 | Hennoxazole D                                                           |                                                                                                                                                  |                                                                                                                                                                                                              |       |
| 226 | Hennoxazole A; 4-Ac                                                     |                                                                                                                                                  | --                                                                                                                                                                                                           |       |
| 227 | Hennoxazole A; O2-De-Me (Hennoxazole E)                                 |                                                                                                                                                  | Cytotoxic against L1210.                                                                                                                                                                                     | [108] |
| 228 | Hennoxazole F                                                           |                                                                                                                                                  | Cytotoxic at a level of IC <sub>50</sub> 2 µg/mL against L1210.                                                                                                                                              |       |
| 229 | Hennoxazole G                                                           |                                                                                                                                                  | Cytotoxic against L1210.                                                                                                                                                                                     |       |
| 230 | Antibiotic B-90063                                                      | Marine Bacterium <i>Blastobacter</i> sp. SANK 71894, isolated from sea water collected on the coast of Ojika Peninsula, Miyagi Pref., Japan.     | An endothelin converting enzyme inhibitor.                                                                                                                                                                   | [109] |
| 231 | R <sub>1</sub> =C(=O)(CH <sub>2</sub> ) <sub>14</sub> CH <sub>3</sub> , | Marine sponge <i>Pachastrissa</i> sp. collected by                                                                                               | Strong active against <i>C. albicans</i> .                                                                                                                                                                   | [110] |

|     |                                                                   |                                                                                                      |                                                                                                                                                                         |
|-----|-------------------------------------------------------------------|------------------------------------------------------------------------------------------------------|-------------------------------------------------------------------------------------------------------------------------------------------------------------------------|
| 232 | $R_2=R_3=R_4=H$<br>$R_4=C(=O)(CH_2)_{14}CH_3,$<br>$R_1=R_2=R_3=H$ | scuba at Musha Archipelago, Republic of Djibouti, in a rocky slope at water deeper than 25 m.        |                                                                                                                                                                         |
| 233 | $R_1=C(=O)(CH_2)_{12}CH(CH_3)_2,$<br>$R_2=R_3=R_4=H$              |                                                                                                      |                                                                                                                                                                         |
| 234 | $R_4=C(=O)(CH_2)_{12}CH(CH_3)_2,$<br>$R_1=R_2=R_3=H$              |                                                                                                      |                                                                                                                                                                         |
| 235 | $R_1=C(=O)(CH_2)_{13}CH_3,$<br>$R_2=R_3=R_4=H$                    |                                                                                                      |                                                                                                                                                                         |
| 236 | $R_4=C(=O)(CH_2)_{13}CH_3,$<br>$R_1=R_2=R_3=H$                    |                                                                                                      |                                                                                                                                                                         |
| 237 | Bengazole A                                                       | Marine sponge of the <i>Choristida</i> order, obtained from new locations in the Benga Lagoon, Fiji. | Inhibition against two human tumor cell lines including colon, COLO-205 <i>in vitro</i> ; anthelmintic activity; antifungal activity against <i>C. albicans</i> . [111] |
| 238 | Bengazole B                                                       |                                                                                                      | Antifungal activity against <i>C. albicans</i> .                                                                                                                        |
| 239 | Bengazole C                                                       | Marine sponge <i>Jaspis</i> sp., from the Great Barrier Reef.                                        | Antifungal assay against <i>C. albicans</i> .                                                                                                                           |
| 240 | Bengazole D                                                       |                                                                                                      |                                                                                                                                                                         |
| 241 | Bengazole E                                                       |                                                                                                      | [112]                                                                                                                                                                   |
| 242 | Bengazole F                                                       |                                                                                                      |                                                                                                                                                                         |
| 243 | Bengazole G                                                       |                                                                                                      |                                                                                                                                                                         |
| 244 | Bengazole B1                                                      |                                                                                                      | [113]                                                                                                                                                                   |
| 245 | Bengazole Z                                                       | --                                                                                                   | [114]                                                                                                                                                                   |
| 246 | Bengazole C <sub>2</sub>                                          | Marine sponge <i>Choristid</i> , collected in Papua New Guinea.                                      | Antifungal; cytotoxic; antiparasitic; tumor-promoting agents.                                                                                                           |
| 247 | Bengazole D <sub>2</sub>                                          |                                                                                                      |                                                                                                                                                                         |
| 248 | Bengazole C <sub>3</sub>                                          |                                                                                                      |                                                                                                                                                                         |
| 249 | Bengazole D <sub>3</sub>                                          |                                                                                                      | [115]                                                                                                                                                                   |
| 250 | Bengazole C <sub>4</sub>                                          |                                                                                                      |                                                                                                                                                                         |
| 251 | Bengazole D <sub>4</sub>                                          |                                                                                                      |                                                                                                                                                                         |
| 252 | Bengazole C <sub>6</sub>                                          |                                                                                                      |                                                                                                                                                                         |

|     |                       |                                                                                                                            |                                                                                                                                             |
|-----|-----------------------|----------------------------------------------------------------------------------------------------------------------------|---------------------------------------------------------------------------------------------------------------------------------------------|
| 253 | Digonazole            | Marine sponge <i>Jaspis digonoxea</i> , collected in Sodwana Bay, South Africa.                                            | Antifungal activity against <i>C. albicans</i> .<br>[116]                                                                                   |
| 254 | 5-epi-Nakijinol C     | Marine sponge <i>Dactylospongia metachromia</i> , collected at Ambon, Indonesia.                                           | Strong inhibitory activity against ALK, FAK, IGF1-R, SRC, VEGF-R2, Aurora-B, MET wt, and NEK6 kinases.<br>[117]                             |
| 255 | (+)-5-epi-nakijinol D | --                                                                                                                         |                                                                                                                                             |
| 256 | (+)-5-epi-nakijinol E | An Indonesian marine sponge <i>Smenospongia</i> .                                                                          | Cytotoxic activity on colon cancer cells.<br>[118]                                                                                          |
| 257 | Nakijinol             | Marine sponge of the family <i>Spongiidae</i> , collected off Nakijin, Okinawa Island.                                     | [119]                                                                                                                                       |
| 258 | (-)-Nakijinol E       | An Indonesian marine sponge <i>Smenospongia</i> .                                                                          | Cytotoxic activity on colon cancer cells.<br>[118]                                                                                          |
| 259 | Nakijinol B           | Marine sponge <i>Dactylospongia elegans</i> , collected from Pugh Shoal, northeast of Truant Island, NT.                   | Cytotoxicity against a panel of human tumor cell lines (SF-268, H460, MCF-7, and HT-29) and a normal mammalian cell line (CHO-K1).<br>[120] |
| 261 | Nakijinol E           | Marine sponge <i>Hyrtios</i> sp., collected off Yongxing Island in the South China Sea.                                    | Anti-inflammatory.<br>Antitumor.<br>[121]                                                                                                   |
| 262 | Nakijinol F           |                                                                                                                            | PTP1B inhibitory activity with an IC <sub>50</sub> value of 4.8 μM.                                                                         |
| 263 | Nakijinol G           |                                                                                                                            |                                                                                                                                             |
| 264 | Nocarbenzoxazole A    | A saltmarsh soil sample, <i>Nocardiopsis lucentensis</i> DSM 44048.                                                        | Antimicrobial activity; antibiotic activity.                                                                                                |
| 265 | Nocarbenzoxazole B    |                                                                                                                            | Antimicrobial activity; antibiotic activity.                                                                                                |
| 266 | Nocarbenzoxazole C    |                                                                                                                            | Antimicrobial activity; antibiotic activity.                                                                                                |
| 267 | Nocarbenzoxazole D    |                                                                                                                            | Antimicrobial activity; antibiotic activity.                                                                                                |
| 268 | Nocarbenzoxazole E    |                                                                                                                            | Antimicrobial activity; antibiotic activity.                                                                                                |
| 269 | Nocarbenzoxazole F    |                                                                                                                            | Anti-inflammatory.                                                                                                                          |
| 270 | Nocarbenzoxazole G    |                                                                                                                            | Selective activity against HepG2 and HeLa cell lines.                                                                                       |
| 271 | Coixol                | Marine sponge <i>Oceanapia</i> sp., collected at a depth of 20 ft by skin diving near Mandapam coast (N 17°, E 83°) India. | Active against brine shrimp assay.<br>[123]                                                                                                 |
| 272 | Homopseudopteroxazole | Sea plume <i>Pseudopterogorgia elisabethae</i> ,                                                                           | A strong growth inhibitor of <i>Mycobacterium tuberculosis</i> H37Rv.<br>[124]                                                              |



|     |                                |                                                                                                                                                                                                                                                                                         |       |
|-----|--------------------------------|-----------------------------------------------------------------------------------------------------------------------------------------------------------------------------------------------------------------------------------------------------------------------------------------|-------|
|     |                                | collected by scuba during an expedition to San Andre's Island, Colombia.                                                                                                                                                                                                                |       |
| 273 | Pseudopteroxazole              | Sea whip <i>Pseudopterogorgia elisabethae</i> , Effect potent inhibitory activity (97%) against <i>M. tuberculosis</i> H37Rv collected near San Andre's Island, Colombia. at a concentration of 12.5 µg/mL.                                                                             | [125] |
| 274 | <i>seco</i> -pseudopteroxazole | Inhibited 66% of mycobacterial growth.                                                                                                                                                                                                                                                  |       |
| 275 | Ileabethoxazole                | Sea whip <i>Pseudopterogorgia elisabethae</i> 92% inhibition of <i>Mycobacterium tuberculosis</i> (H37Rv) at the removed by scuba from their natural habitat concentration range of 128 - 64 µg/ mL . at depths of 25 - 30 m near the Island of Providencia (Old Providence), Colombia. | [126] |
| 276 | Oxazocurcuphenol               | Soft coral <i>Pseudopterogorgia rigida</i> , collected-- by SCUBA diving southeast of Lighthouse Point in Eleuthera island in the Bahamas, at a depth of 20 - 30 m.                                                                                                                     | [130] |
| 277 | Citharoxazole                  | Marine sponge <i>Latrunculia (Biannulata)-- citharistae</i> , found at depths around 130 - 150 m in the western Mediterranean sea.                                                                                                                                                      | [127] |
| 278 | Herqueioxazole                 | Marine-derived fungus <i>Penicillium</i> sp. from a Marginally active against the lung carcinoma A549 cell line. marine sediment.                                                                                                                                                       | [128] |
| 279 | Nakijinamine C                 | An Okinawan marine sponge <i>Suberites</i> sp. Antifungal activity against <i>Aspergillus niger</i> with MIC values of 16 µg/mL .                                                                                                                                                       | [129] |
| 280 | Nakijinamine E                 |                                                                                                                                                                                                                                                                                         |       |
| 281 | Caboxamycin                    | <i>Streptomyces</i> sp. NTK 937, isolated from an Antibiotic activity; a moderate growth inhibitory activity towards Atlantic Ocean deep-sea sediment core. AGS, HepG2 and MCF7.                                                                                                        | [130] |
| 282 | Hamigeran M                    | Marine sponge <i>Hamigera tarangaensis</i> , The high efficacy against HL-60 promyelocytic leukemia cell line. collected from Cavalli Island, New Zealand.                                                                                                                              | [131] |
| 283 | Citreamicin 0A                 | Marine-derived <i>Streptomyces</i> sp., isolated Antibacterial activity against <i>Staphylococcus haemolyticus</i> , from the coastal water of the red sea by the <i>Staphylococcus aureus</i> , and <i>Bacillus subtilis</i> with MIC of 0.25 µg/mL.                                   | [132] |
| 284 | Citreamicin 0B                 | side of a fish market near Jeddah.                                                                                                                                                                                                                                                      |       |
| 285 | Ergosinine                     | Sea slug <i>Pleurobranchus forskalii</i> , collected off-- Ishigaki Island, Japan.                                                                                                                                                                                                      | [133] |

## References

1. N'Diaye, I.; Guella, G.; Chiasera, G.; Mancini, I.; Pietra, F., Almazole A and almazole B, unusual marine alkaloids of an unidentified red seaweed of the family delesseriaceae from the coasts of Senegal. *Tetrahedron Lett.* **1994**, *35*, 4827-4830. [CrossRef]
2. Guella, G.; Mancini, I.; Pietra, F., Almazole C, a new indole alkaloid bearing an unusually 2,5-disubstituted oxazole moiety, and its putative biogenetic peptidic precursors, from a senegalese delesseriacean seaweed. *Helvetica Chimica Acta.* **1994**, *77*, 1999-2006. [CrossRef]
3. N'Diaye, I.; Guella, G.; Mancini, I.; Pietra, F., Almazole D, a new type of antibacterial 2,5-disubstituted oxazolic dipeptide from a red alga of the coast of Senegal. *Tetrahedron Lett.*, **1996**, *37*, 3049-3050. [CrossRef]
4. Shin, H.J.; Jeong, H.S.; Lee, H.S.; Park, S.K.; Kim, H.M.; Kwon, H.J., Isolation and structure determination of streptochlorin, an antiproliferative agent from a marine-derived *Streptomyces* sp. 04DH110. *J. Microbiol. Biotechnol.* **2007**, *17*, 1403-1406. [CrossRef]
5. Takahashi, S.; Matsunaga, T.; Hasegawa, C.; Saito, H.; Fujita, D.; Kiuchi, F.; Tsuda, Y., Martefragin A, a novel indole alkaloid isolated from red alga, inhibits lipid peroxidation. *Chem. Pharm. Bull.* **1998**, *46*, 1527-1529. [CrossRef]
6. Guella, G.; N'Diaye, I.; Fofana, M.; Mancini, I., Isolation, synthesis and photochemical properties of almazolone, a new indole alkaloid from a red alga of Senegal. *Tetrahedron* **2006**, *62*, 1165-1170. [CrossRef]
7. Schneider, Y.; Jenssen, M.; Isaksson, J.; Hansen, K.O.; Andersen, J.H.; Hansen, E.H., Bioactivity of serratiochelin A, a siderophore isolated from a co-culture of *Serratia* sp. and *Shewanella* sp. *Microorganisms* **2020**, *8*, 1-17. [CrossRef]
8. Motohashi, K.; Takagi, M.; Shin-Ya, K., Tetrapeptides possessing a unique skeleton, JBIR-34 and JBIR-35, isolated from a sponge-derived actinomycete, *Streptomyces* sp. Sp080513GE-23. *J. Nat. Prod.* **2010**, *73*, 226-228. [CrossRef]
9. Nielsen, A.; Mansson, M.; Wietz, M.; Varming, A.N.; Phipps, R.K.; Larsen, T.O.; Gram, L.; Ingmer, H., Nigribactin, a novel siderophore from *Vibrio nigripulchritudo*, modulates *Staphylococcus aureus* virulence gene expression. *Mar. Drugs* **2012**, *10*, 2584-2595. [CrossRef]
10. Rudi, A.; Stein, Z.; Green, S.; Goldberg, I.; Kashman, Y.; Benayahu, Y.; Schleyer, M., Phorbazoles A-D, novel chlorinated phenylpyrrolyloxazoles from the marine sponge *Phorbos aff. clathrata*. *Tetrahedron Lett.* **1994**, *35*, 2589-2592. [CrossRef]
11. Nuzzo, G.; Ciavatta, M.L.; Kiss, R.; Mathieu, V.; Leclercqz, H.; Manzo, E.; Villani, G.; Mollo, E.; Lefranc, F.; D'Souza, L.; Gavagnin, M.; Cimino, G., Chemistry of the nudibranch *Aldisa andersoni*: structure and biological activity of phorbazole metabolites. *Mar. Drugs* **2012**, *10*, 1799-1811. [CrossRef]
12. Oku, N.; Adachi, K.; Matsuda, S.; Kasai, H.; Takatsuki, A.; Shizuri, Y., Ariakemicins A and B, novel polyketide-peptide antibiotics from a marine gliding bacterium of the genus *Rapidithrix*. *Org. Lett.* **2008**, *10*, 2481-2484. [CrossRef]
13. Hanssen, K.O.; Schuler, B.; Williams, A.J.; Demissie, T.B.; Hansen, E.; Andersen, J.H.; Svenson, J.; Blinov, K.; Repisky, M.; Mohn, F.; Meyer, G.; Svendsen, J.S.; Ruud, K.; Elyashberg, M.; Gross, L.; Jaspars, M.; Isaksson, J., A combined atomic force microscopy and computational approach for the structural elucidation of breitfussin A and B: highly modified halogenated dipeptides from *Thuiaria breitfussi*. *Angew Chem. Int. Ed. Engl.* **2012**, *51*, 12238-12241. [CrossRef]

14. Hansen, K.O.; Andersen, J.H.; Bayer, A.; Pandey, S.K.; Lorentzen, M.; Jorgensen, K.B.; Sydnes, M.O.; Guttormsen, Y.; Baumann, M.; Koch, U.; Klebl, B.; Eickhoff, J.; Haug, B.E.; Isaksson, J.; Hansen, E.H., Kinase chemodiversity from the arctic: the breitfussins. *J. Med. Chem.* **2019**, *62*, (22), 10167-10181. [CrossRef]
15. [15] Kanoh, K.; Matsuo, Y.; Adachi, K.; Imagawa, H.; Nishizawa, M.; Shizuri, Y., Mechercharmucins A and B, cytotoxic substances from marine-derived *Thermoactinomyces* sp. YM3-251. *J. Antibiot.* **2005**, *58*, 289-292. [CrossRef]
16. Nett, M.; Erol, O.; Kehraus, S.; Kock, M.; Krick, A.; Eguereva, E.; Neu, E.; Konig, G.M., Siphonazole, an unusual metabolite from *Herpetosiphon* sp. *Angew Chem. Int. Ed. Engl.* **2006**, *45*, 3863-3867. [CrossRef]
17. Fukuhara, K.; Takada, K.; Okada, S.; Matsunaga, S., Nazumazoles A-C, cyclic pentapeptides dimerized through a disulfide bond from the marine sponge *Theonella swinhoei*. *Org. Lett.* **2015**, *17*, 2646-2648. [CrossRef]
18. Fukuhara, K.; Takada, K.; Okada, S.; Matsunaga, S., Nazumazoles D-F, cyclic pentapeptides that inhibit chymotrypsin, from the marine sponge *Theonella swinhoei*. *J. Nat. Prod.* **2016**, *79*, 1694-1697. [CrossRef]
19. Nobuhiro Fusetani, T.S., and Shigeki Matsunaga, Orbiculamide A: a novel cytotoxic cyclic peptide from a marine sponge *Theonella* sp. *J. Am. Chem. Soc.* **1991**, *113*, 7811-7812. [CrossRef]
20. Kobayashi, J.; Itagaki, F.; Shigemori, H.; Ishibashi, M.; Takahashi, K.; Ogura, M.; Nagasawa, S.; Nakamura, T.; Hirota, H., Keramamides B-D, novel peptides from the Okinawan marine sponge *Theonella* sp. *J. Am. Chem. Soc.* **1991**, *113*, 7812-7813. [CrossRef]
21. Kobayashi, J.i.; Itagaki, F.; Shigemori, I.; Takao, T.; Shimonishi, Y., Keramamides E, G, H, and J, new cyclic peptides containing an oxazole or a thiazole ring from a *Theonella* sponge. *Tetrahedron* **1995**, *51*, 2525-2532. [CrossRef]
22. Tsuda, M.; Ishiyama, H.; Masuko, K.; Takao, T.; Shimonishi, Y.; Kobayashi, J.i., Keramamides M and N, two new cyclic peptides with a sulfate ester from *Theonella* sponge. *Tetrahedron* **1999**, *55*, 12543-12548. [CrossRef]
23. Gunasekera, S.P.; Pomponi, S.A.; McCarthy, P.J., Discobahamins A and B, new peptides from the Bahamian deep water marine sponge *Discodermia* sp. *J. Nat. Prod.* **1994**, *57*, 79-83. [CrossRef]
24. Degnan, B.M.; Hawkins, C.J.; Lavin, M.F.; McCaffrey, E.J.; Parry, D.L.; Watters, D.J., Novel cytotoxic compounds from the ascidian *Lissoclinum bistratum*. *J. Med. Chem.* **1989**, *32*, 1354-1359. [CrossRef]
25. Foster, M.P.; Concepcion, G.P.; Caraan, G.B.; Ireland, C.M., Bistratamides C and D. Two new oxazole-containing cyclic hexapeptides isolated from a Philippine *Lissoclinum bistratum* ascidian. *J. Org. Chem.* **1992**, *57*, 6671-6675. [CrossRef]
26. Perez, L.J.; Faulkner, D.J., Bistratamides E-J, modified cyclic hexapeptides from the Philippines ascidian *Lissoclinum bistratum*. *J. Nat. Prod.* **2003**, *66*, 247-250. [CrossRef]
27. Urda, C.; Fernandez, R.; Rodriguez, J.; Perez, M.; Jimenez, C.; Cuevas, C., Bistratamides M and N, oxazole-thiazole containing cyclic hexapeptides isolated from *Lissoclinum bistratum* interaction of Zinc (II) with bistratamide K. *Mar. Drugs*. **2017**, *15*, 1-11. [CrossRef]
28. Prinsep, M.R.; Moore, R.E.; Levine, I.A.; Patterson, G.M., Westiellamide, a bistratamide-related cyclic peptide from the blue-green alga *Westiellopsis prolifica*. *J. Nat. Prod.* **1992**, *55*, 140-142. [CrossRef]

29. Ogino, J.; Moore, R.E.; Patterson, G.M.; Smith, C.D., Dendroamides, new cyclic hexapeptides from a blue-green alga. Multidrug-resistance reversing activity of dendroamide A. *J. Nat. Prod.* **1996**, *59*, 581-586. [CrossRef]
30. Rudi, A.; Chill, L.; Akinin, M.; Kashman, Y., Didmolamide A and B, two new cyclic hexapeptides from the marine ascidian *Didemnum molle*. *J. Nat. Prod.* **2003**, *66*, 575-577. [CrossRef]
31. Ojika, M.; Nemoto, T.; Nakamura, M.; Yamada, K., Dolastatin E, a new cyclic hexapeptide isolated from the sea hare *Dolabella auricularia*. *Tetrahedron Lett.* **1995**, *36*, 5057-5058. [CrossRef]
32. Sone, H.; Kigoshi, H.; Yamada, K., Isolation and stereostructure of dolastatin I, a cytotoxic cyclic hexapeptide from the Japanese sea hare *Dolabella auricularia*. *Tetrahedron* **1997**, *53*, 8149-8154. [CrossRef]
33. Kehraus, S.; Konig, G.M.; Wright, A.D.; Woerheide, G., Leucamide A: a new cytotoxic heptapeptide from the Australian sponge *Leucetta microraphis*. *J. Org. Chem.* **2002**, *67*, 4989-4992. [CrossRef]
34. Rudi, A.; Akinin, M.; Gaydou, E.M.; Kashman, Y., Four new cytotoxic cyclic hexa- and heptapeptides from the marine ascidian *Didemnum molle*. *Tetrahedron* **1998**, *54*, 13203-13210. [CrossRef]
35. Linington, R.G.; Gonzalez, J.; Urena, L.D.; Romero, L.I.; Ortega-Barria, E.; Gerwick, W.H., Venturamides A and B: antimalarial constituents of the panamanian marine cyanobacterium *Oscillatoria* sp. *J. Nat. Prod.* **2007**, *70*, 397-401. [CrossRef]
36. Banker, R.; Carmeli, S., Tenuencyclamides A-D, cyclic hexapeptides from the cyanobacterium *Nostoc spongiaeforme* var. *tenue*. *J. Nat. Prod.* **1998**, *61*, 1248-1251. [CrossRef]
37. shida, K.; Nakagawa, H.; Murakami, M., Microcyclamide, a cytotoxic cyclic hexapeptide from the cyanobacterium *Microcystis aeruginosa*. *J. Nat. Prod.*, **2000**, *63*, (9), 1315-1317. [CrossRef]
38. Raveh, A.; Moshe, S.; Evron, Z.; Flescher, E.; Carmeli, S., Novel thiazole and oxazole containing cyclic hexapeptides from a waterbloom of the cyanobacterium *Microcystis* sp. *Tetrahedron*, **2010**, *66*, 2705-2712. [CrossRef]
39. Houssen, W.E.; Koehnke, J.; Zollman, D.; Vendome, J.; Raab, A.; Smith, M.C.; Naismith, J.H.; Jaspars, M., The discovery of new cyanobactins from *Cyanothece* PCC 7425 defines a new signature for processing of patellamides. *Chembiochem.*, **2012**, *13*, (18), 2683-2689. [CrossRef]
40. Toske, S.G.; Fenical, W., Cyclodidemnamide: a new cyclic heptapeptide from the marine ascidian *Didemnum Molle*. *Tetrahedron Lett.* **1995**, *36*, 8355-8358. [CrossRef]
41. Tan, L.T.; Williamson, R.T.; Gerwick, W.H.; Watts, K.S.; McGough, K.; Jacobs, R., *Cis,cis*- and *trans,trans*-ceratospongamide, new bioactive cyclic heptapeptides from the Indonesian red alga *Ceratodictyon spongiosum* and symbiotic sponge *Sigmatocia symbiotica*. *J. Org. Chem.* **2000**, *65*, 419-425. [CrossRef]
42. Wasyluk J. M.; Biskupiak J. E.; Costello C. E.; Ireland C. M., Cyclic peptide structures from the tunicate *Lissoclinum patella* by FAB mass spectrometry. *J. Org. Chem.* **1983** *48*, 4445-4449. [CrossRef]
43. Schmitz, F.J.; Ksebati, M.B.; Chang, J.S.; Wang, J.L.; Hossain, M.B.; Van der Helm, D.; Engel, M.H.; Serban, A.; Silfer, J.A., Cyclic peptides from the ascidian *Lissoclinum patella*: conformational analysis of patellamide D by x-ray analysis and molecular modeling. *J. Org. Chem.* **2002**, *54*, 3463-3472. [CrossRef]

44. Hawkins, C.J.; Lavin, M.F.; Marshall, K.A.; van den Brenk, A.L.; Watters, D.J., Structure-activity relationships of the lissoclinamides: cytotoxic cyclic peptides from the ascidian *Lissoclinum patella*. *J. Med. Chem.* **1990**, *33*, 1634-1638. [CrossRef]
45. Morris, L.A.; Jantina Kettenes van den Bosch, J.; Versluis, K.; Thompson, G.S.; Jaspars, M., Structure determination and MSn analysis of two new lissoclinamides isolated from the Indo-Pacific ascidian *Lissoclinum patella*: NOE restrained molecular dynamics confirms the absolute stereochemistry derived by degradative methods. *Tetrahedron* **2000**, *56*, 8345-8353. [CrossRef]
46. Ireland, C.; Scheuer, P.J., Ulicyclamide and ulithiacyclamide, two new small peptides from a marine tunicate. *J. Am. Chem. Soc.* **1980**, *102*, 5688-5691. [CrossRef]
47. Dalisay, D.S.; Rogers, E.W.; Edison, A.S.; Molinski, T.F., Structure elucidation at the nanomole scale. 1. Trisoxazole macrolides and thiazole-containing cyclic peptides from the nudibranch *Hexabranhus sanguineus*. *J. Nat. Prod.* **2009**, *72*, 732-738. [CrossRef]
48. Erickson, K.L.; Gustafson, K.R.; Milanowski, D.J.; Pannell, L.K.; Klose, J.R.; Boyd, M.R., Myriastramides A-C, new modified cyclic peptides from the Philippines marine sponge *Myriastrum clavosa*. *Tetrahedron* **2003**, *59*, 10231-10238. [CrossRef]
49. Guan, L.L.; Sera, Y.; Adachi, K.; Nishida, F.; Shizuri, Y., Isolation and evaluation of nonsiderophore cyclic peptides from marine sponges. *Biochem. Biophys. Res. Commun.* **2001**, *283*, 976-981. [CrossRef]
50. Sera, Y.; Adachi, K.; Fujii, K.; Shizuri, Y., Isolation of haliclonamides: new peptides as antifouling substances from a marine sponge species, *Haliclona*. *Mar. Biotechnol. (NY)*. **2002**, *4*, 441-446. [CrossRef]
51. Festa, C.; De Marino, S.; D'Auria, M.V.; Monti, M.C.; Bucci, M.; Vellecco, V.; Debitus, C.; Zampella, A., Anti-inflammatory cyclopeptides from the marine sponge *Theonella swinhoei*. *Tetrahedron* **2012**, *68*, 2851-2857. [CrossRef]
52. Hamamoto, Y.; Endo, M.; Nakagawa, M.; Nakanishi, T.; Mizukawa, K., A new cyclic peptide, ascidiacyclamide, isolated from ascidian. *J. Chem. Soc. Chem Commun.* **1983**, *5*, 323-324. [CrossRef]
53. Fu, X.; Su, J.Y.; Zeng, L.M., Prepatellamide A, a new cyclic peptide from the ascidian *Lissoclinum patella*. *Sci. China Ser. B.* **2000**, *43*, 643-648. [CrossRef]
54. Sesin, D.F.; Gaskell, S.J.; Ireland, C.M., The chemistry of *Lissoclinum Patella*. *Bull. Soc. Chim. Belq.* **1986**, *95*, 853-867. [CrossRef]
55. Ireland, C.M.; Durso, A.R.; Newman, R.A.; Hacker, M.P., Antineoplastic cyclic peptides from the marine tunicate *Lissoclinum patella*. *J. Org Chem.* **2002**, *47*, 1807-1811. [CrossRef]
56. Fu, X.; Do, T.; Schmitz, F.J.; Andrushevich, V.; Engel, M.H., New cyclic peptides from the ascidian *Lissoclinum patella*. *J. Nat. Prod.*, **1998**, *61*, (12), 1547-1551. [CrossRef]
57. In, Y.; Doi, M.; Inoue, M.; Ishida, T.; Hamada, Y.; Shioiri, T., Patellamide A, a cytotoxic cyclic peptide from the ascidian *Lissoclinum patella*. *Acta. Crystallogr C.*, **1994**, *50*, (3), 432-434. [CrossRef]
58. Williams, A.B.; Jacobs, R.S., A marine natural product, patellamide D, reverses multidrug resistance in a human leukemic cell line. *Cancer Lett.* **1993**, *71*, 97-102. [CrossRef]
59. McDonald, L.A.; Ireland, C.M., Patellamide E: a new cyclic peptide from the ascidian *Lissoclinum patella*. *J. Nat. Prod.* **1992**, *55*, 376-379. [CrossRef]

60. Rashid, M.A.; Gustafson, K.R.; Cardellina, J.H.; Boyd, M.R., Patellamide F, A new cytotoxic cyclic peptide from the colonial ascidian *Lissoclinum patella*. *J. Nat. Prod.* **1995**, *58*, 594-597. [CrossRef]
61. Matsuo, Y.; Kanoh, K.; Yamori, T.; Kasai, H.; Katsuta, A.; Adachi, K.; Shin-Ya, K.; Shizuri, Y., Urukthapelstatin A, a novel cytotoxic substance from marine-derived *Mechercharimyces asporophorigenens* YM11-542. I. Fermentation, isolation and biological activities. *J. Antibiot* **2007**, *60*, 251-255. [CrossRef]
62. Engelhardt, K.; Degnes, K.F.; Kemmler, M.; Bredholt, H.; Fjaervik, E.; Klinkenberg, G.; Sletta, H.; Ellingsen, T.E.; Zotchev, S.B., Production of a new thiopeptide antibiotic, TP-1161, by a marine *Nocardiopsis* species. *Appl. Environ. Microbiol.* **2010**, *76*, 4969-4976. [CrossRef]
63. Nogle, L.M.; Marquez, B.L.; Gerwick, W.H., Wewakazole, a novel cyclic dodecapeptide from a Papua new guinea *Lyngbya majuscula*. *Org. Lett.* **2003**, *5*, 3-6. [CrossRef]
64. Lopez, J.A.; Al-Lihaibi, S.S.; Alarif, W.M.; Abdel-Lateff, A.; Nogata, Y.; Washio, K.; Morikawa, M.; Okino, T., Wewakazole B, a cytotoxic cyanobactin from the cyanobacterium *Moorea producents* collected in the red sea. *J. Nat. Prod.* **2016**, *79*, 1213-1218. [CrossRef]
65. Lindquist, N.; Fenical, W.; Van Duyne, G.D.; Clardy, J., Isolation and structure determination of diazonamides A and B, unusual cytotoxic metabolites from the marine ascidian *Diazona chinensis*. *J. Am. Chem. Soc.* **1991**, *113*, 2303-2304. [CrossRef]
66. Fernández, R.; Martín, M.J.; Rodríguez-Acebes, R.; Reyes, F.; Francesch, A.; Cuevas, C., Diazonamides C–E, new cytotoxic metabolites from the ascidian *Diazona* sp. *Tetrahedron Lett.* **2008**, *49*, 2283-2285. [CrossRef]
67. Williams, D.E.; Moore, R.E.; Paul, V.J., The structure of ulithiacyclamide B. Antitumor evaluation of cyclic peptides and macrolides from *Lissoclinum patella*. *J. Nat. Prod.* **1989**, *52*, 732-739. [CrossRef]
68. Bishara, A.; Rudi, A.; Akin, M.; Neumann, D.; Ben-Califa, N.; Kashman, Y., Taumycins A and B, two bioactive lipodepsipeptides from the Madagascar sponge *Fascaplysinopsis* sp. *Org. Lett.* **2008**, *10*, 4307-4309. [CrossRef]
69. Tada, H.; Tozzyo, T.; Terui, Y.; Hayashi, F., Discokiolides. Cytotoxic cyclic depsipeptides from the marine sponge *Discodermia kiiensis*. *Chem. Lett.* **1992**, 431-434. [CrossRef]
70. Searle, P.A.; Molinski, T.F.; Brzezinski, L.J.; Leahy, J.W., Absolute configuration of phorboxazoles A and B from the marine sponge *Phorbas* sp. 1. Macrolide and hemiketal rings. *J. Am. Chem. Soc.* **1996**, *118*, 9422-9423. [CrossRef]
71. Dalisay, D.S.; Molinski, T.F., Structure elucidation at the nanomole scale. 2. Hemi-phorboxazole A from *Phorbas* sp. *Org. Lett.* **2009**, *11*, 1967-1970. [CrossRef]
72. Sandler, J.S.; Colin, P.L.; Kelly, M.; Fenical, W., Cytotoxic macrolides from a new species of the deep-water marine sponge *Leiodermatium*. *J. Org. Chem.* **2006**, *71*, 7245-7251. [CrossRef]
73. Bishara, A.; Rudi, A.; Akin, M.; Neumann, D.; Ben-Califa, N.; Kashman, Y., Salarin C, a new cytotoxic sponge-derived nitrogenous macrolide. *Tetrahedron Lett.* **2008**, *49*, 4355-4358. [CrossRef]
74. Bishara, A.; Rudi, A.; Akin, M.; Neumann, D.; Ben-Califa, N.; Kashman, Y., Salarins D-J, seven new nitrogenous macrolides from the madagascar sponge *Fascaplysinopsis* sp. *Tetrahedron* **2010**, *66*, 4339-4345. [CrossRef]
75. Kobayashi, J.; Kondo, K.; Ishibashi, M.; Walchli, M.R.; Nakamura, T., Theonezolid A: a novel polyketide natural product from the Okinawan marine sponge *Theonella* sp. *J. Am. Chem. Soc.* **1993**, *115*, 6661-6665. [CrossRef]

76. Kondo, K.; Ishibashi, M.; Kobayashi, J.i., Isolation and structures of theonezolides B and C from the Okinawan marine sponge *Theonella* sp. *Tetrahedron* **1994**, *50*, 8355-8362. [CrossRef]
77. Petchprayoon, C.; Asato, Y.; Higa, T.; Garcia-Fernandez, L.F.; Pedpradab, S.; Marriott, G.; Suwanborirux, K.; Tanaka, J., Four new kabiramides from the Thai sponge, *Pachastrissa nux*. *Heterocycles* **2006**, *69*, 447-+. [CrossRef]
78. Kobayashi, J.i.; Tsuda, M.; Fuse, H.; Sasaki, T.; Mikami, Y., Halishigamides A-D, new cytotoxic oxazole-containing metabolites from Okinawan sponge *Halichondria* sp. *J. Nat. Prod.* **1997**, *60*, 150-154. [CrossRef]
79. Rashid, M.A.; Gustafson, K.R.; Cardellina II, J.H.; Boyd, M.R., Mycalolides D and E, new cytotoxic macrolides from a collection of the stony coral *Tubastrea faulkneri*. *J. Nat. Prod.* **1995**, *58*, 1120-1125. [CrossRef]
80. Roesener, J.A.; Scheuer, P.J., Ulapualide A and B, extraordinary antitumor macrolides from nudibranch eggmasses. *J. Am Chem Soc.* **1986**, *108*, 846-847. [CrossRef]
81. Parrish, S.M.; Yoshida, W.; Yang, B.; Williams, P.G., Ulapualides C-E isolated from a Hawaiian *Hexabranhus sanguineus* egg mass. *J. Nat. Prod.* **2017**, *80*, 726-730. [CrossRef]
82. Suo, R.; Takada, K.; Kohtsuka, H.; Ise, Y.; Okada, S.; Matsunaga, S., Miuramides A and B, trisoxazole macrolides from a *Mycale* sp. marine sponge that induce a protrusion phenotype in cultured mammalian cells. *J. Nat Prod.* **2018**, *81*, 1108-1112. [CrossRef]
83. Fusetani, N.; Yasumuro, K.; Matsunaga, S.; Hashimoto, K., Mycalolides A- C, hybrid macrolides of ulapualides and halichondramide, from a sponge of the genus *Mycale*. *Tetrahedron Lett.* **1989**, *30*, 2809-2812. [CrossRef]
84. Matsunaga, S.; Sugawara, T.; Fusetani, N., New mycalolides from the marine sponge *Mycale magellanica* and their interconversion. *J. Nat. Prod.* **1998**, *61*, 1164-1167. [CrossRef]
85. Phuwapraisirisan, P.; Matsunaga, S.; van Soest, R.W.; Fusetani, N., Isolation of a new mycalolide from the marine sponge *Mycale izuensis*. *J. Nat. Prod.* **2002**, *65*, 942-943. [CrossRef]
86. Kernan, M.R.; Faulkner, D.J., Halichondramide, an antifungal macrolide from the sponge *Halichondria* sp. *Tetrahedron Lett.* **1987**, *28*, 2809-2812. [CrossRef]
87. Kernan, M.R.; Molinski, T.F.; Faulkner, D.J., Macrocyclic antifungal metabolites from the Spanish dancer nudibranch *Hexabranhus sanguineus* and sponges of the genus *Halichondria*. *J. Org. Chem.* **1988**, *53*, 5014-5020. [CrossRef]
88. Shin, J.; Lee, H.S.; Kim, J.Y.; Shin, H.J.; Ahn, J.W.; Paul, V.J., New macrolides from the sponge *Chondrosia corticata*. *J. Nat Prod.* **2004**, *67*, 1889-1892. [CrossRef]
89. Kobayashi, J.i.; Murata, O.; Shigemori, H.; Sasaki, T., Jaspisamides A-C, new cytotoxic macrolides from the Okinawan sponge *Jaspis* sp. *J. Nat Prod.* **1993**, *56*, 787-791. [CrossRef]
90. Matsunaga, S., Further kabiramides and halichondramides, cytotoxic macrolides embracing trisoxazole, from the *Hexabranhus* Egg Masses. *J. Org. Chem.* **1989**, *54*, 1360-1363. [CrossRef]
91. Matsunaga, S.; Fusetani, N.; Hashimoto, K., Kabiramide C, a novel antifungal macrolide from nudibranch eggmasses. *J. Am. Chem. Soc.* **1986**, *108*, 847-849. [CrossRef]

92. Sirirak, T.; Kittiwisut, S.; Janma, C.; Yuenyongsawad, S.; Suwanborirux, K.; Plubrukarn, A., Kabiramides J and K, trisoxazole macrolides from the sponge *Pachastrissa nux*. *J. Nat. Prod.* **2011**, 74, 1288-1292. [CrossRef]
93. Sirirak, T.; Brecker, L.; Plubrukarn, A., Kabiramide L, a new antiparasmodial trisoxazole macrolide from the sponge *Pachastrissa nux*. *Nat. Prod. Res.*, **2013**, 27, (13), 1213-1219. [CrossRef]
94. Wright, A.E.; Botelho, J.C.; Guzman, E.; Harmody, D.; Linley, P.; McCarthy, P.J.; Pitts, T.P.; Pomponi, S.A.; Reed, J.K., Neopeltolide, a macrolide from a lithistid sponge of the family *Neopeltidae*. *J. Nat. Prod.* **2007**, 70, 412-416. [CrossRef]
95. D'Ambrosio, M.; Guerriero, A.; Debitus, C.; Pietra, F., Leucascandrolide A, a new type of macrolide: the first powerfully bioactive metabolite of calcareous sponges (*Leucascandra caveolata*, a new genus from the coral sea). *Helv. Chim. Acta.* **1996**, 79, 51-60. [CrossRef]
96. Oku, N.; Takada, K.; Fuller, R.W.; Wilson, J.A.; Peach, M.L.; Pannell, L.K.; McMahon, J.B.; Gustafson, K.R., Isolation, structural elucidation, and absolute stereochemistry of enigmazole A, a cytotoxic phosphomacrolide from the Papua new guinea marine sponge *Cinachyrella enigmatica*. *J. Am. Chem. Soc.* **2010**, 132, 10278-10285. [CrossRef]
97. Kato, Y.; Fusetani, N.; Matsunaga, S.; Hashimoto, K.; Fujita, S.; Furuya, T., Calyculin A, a novel antitumor metabolite from the marine sponge *Discodermia calyx*. *J. Am. Chem. Soc.* **1986**, 108, (10), 2780-2781. [CrossRef]
98. Matsunaga, S.; Wakimoto, T.; Fusetani, N., Isolation of four new calyculins from the marine sponge *Discodermia calyx*. *J. Org. Chem.*, **1997**, 62, (26), 9388-9388. [CrossRef]
99. Yuko, K.; Nobuhiro, F.; Shigeki, M.; Kanehisa, H., Isolation and structure elucidation of calyculins B, C, and D, novel antitumor metabolites, from the marine sponge *Discodermia calyx*. *J. Org. Chem.* **1988**, 53, 3930-3932. [CrossRef]
100. Matsunaga, S.; Fujiki, H.; Sakata, D.; Fusetani, N., Calyculins E, F, G, and H, additional inhibitors of protein phosphatases 1 and 2A, from the marine sponge *Discodermia calyx*. *Tetrahedron* **2010**, 22, 2999-3006. [CrossRef]
101. Matsunaga, S.; Wakimoto, T.; Fusetani, N.; Suganuma, M., Isolation of dephosphonocalyculin a from the marine sponge, *Discodermia calyx*. *Tetrahedron Lett.*, **1997**, 38, 3763-3764. [CrossRef]
102. Dumdei, E.J.; Blunt, J.W.; Munro, M.H.; Pannell, L.K., Isolation of calyculins, calyculinamides, and swinholid H from the New Zealand deep-water marine sponge *Lamellomorpha strongylata*. *J. Org. Chem.*, **1997**, 62, (8), 2636-2639. [CrossRef]
103. Fu, X.; Schmitz, F.J.; Kelly-Borges, M.; McCready, T.L.; Holmes, C.F.B., Clavosines A-C from the marine sponge *Myriastras clavosa*: potent cytotoxins and inhibitors of protein phosphatases 1 and 2A. *J. Org. Chem.* **1998**, 63, 7957-7963. [CrossRef]
104. Kehraus, S.; Konig, G.M.; Wright, A.D., A new cytotoxic calyculinamide derivative, geometricin A, from the Australian sponge *Luffariella geometrica*. *J. Nat. Prod.* **2002**, 65, 1056-1058. [CrossRef]
105. Edrada, R.A.; Ebel, R.; Supriyono, A.; Wray, V.; Schupp, P.; Steube, K.; van Soest, R.; Proksch, P., Swinhoeiamide A, a new highly active calyculin derivative from the marine sponge *Theonella swinhoei*. *J. Nat. Prod.*, **2002**, 65, 1168-1172. [CrossRef]
106. Wu, Q.H.; Zhang, G.Y.; Wang, B.X.; Li, X.; Yue, S.P.; Chen, J.W.; Zhang, H.W.; Wang, H., Production and identification of inthomycin B produced by a deep-sea sediment-derived *Streptomyces* sp. YB104 based on cultivation-dependent approach. *Curr. Microbio.* **2018**, 75, 942-951. [CrossRef]



107. Ichiba, T.; Yoshida, W.Y.; Scheuer, P.J.; Higa, T.; Gravalos, D.G., Hennoxazoles, bioactive bisoxazoles from a marine sponge. *J. Am. Chem. Soc.*, **1991**, *113*, (8), 3173-3174. [CrossRef]
108. Higa, T.; Tanaka, J.I.; Kitamura, A.; Koyama, T.; Takahashia, M.; Uchida, T., Bioactive compounds from marine sponges. *Pure. Appl. Chem.* **1994**, *66*, 2227-2230. [CrossRef]
109. Takaishi, S.; Tuchiya, N.; Sato, A.; Negishi, T.; Takamatsu, Y.; Matsushita, Y.; Watanabe, T.; Iijima, Y.; Haruyama, H.; Kinoshita, T.; Tanaka, M.; Kodama, K., B-90063, a novel endothelin converting enzyme inhibitor isolated from a new marine bacterium, *Blastobacter* sp. SANK 71894. *J. Antibiot* **1998**, *51*, 805-815. [CrossRef]
110. Fernandez, R.; Dherbomez, M.; Letourneux, Y.; Nabil, M.; Verbist, J.F.; Biard, J.F., Antifungal metabolites from the marine sponge *Pachastrissa* sp.: new bengamide and bengazole derivatives. *J. Nat. Prod.* **1999**, *62*, 678-680. [CrossRef]
111. Adamczeski, M.; Quinoa, E.; Crews, P., Unusual anthelmintic oxazoles from a marine sponge. *J. Am. Chem. Soc.*, **1988**, *110*, (5), 1598-1602. [CrossRef]
112. Searle, P.A.; Richter, R.K.; Molinski, T.F., Bengazoles C-G from the sponge *Jaspis* sp. Synthesis of the side chain and determination of absolute configuration. *J. Org. Chem.* **1996**, *61*, 4073-4079. [CrossRef]
113. Molinski, T.F., Developments in marine natural products. Receptor-specific bioactive compounds. *J. Nat. Prod.*, **1993**, *56*, (1), 1-8. [CrossRef]
114. Groweiss, A.; Newcomer, J.J.; O'Keefe, B.R.; Blackman, A.; Boyd, M.R., Cytotoxic metabolites from an Australian collection of the sponge *Jaspis* species. *J. Nat. Prod.* **1999**, *62*, 1691-1693. [CrossRef]
115. Rodríguez, J.; Nieto, R.M.; Crews, P., New structures and bioactivity patterns of bengazole alkaloids from a *Choristid* marine sponge. *J. Nat. Prod.* **1993**, *56*, 2034-2040. [CrossRef]
116. Rudi, A.; Kashman, Y.; Benayahu, Y.; Schleyer, M., Amino acid derivatives from the marine sponge *Jaspis digonoxea*. *J. Nat. Prod.* **1994**, *57*, 829-832. [CrossRef]
117. Daletos, G.; de Voogd, N.J.; Muller, W.E.; Wray, V.; Lin, W.; Feger, D.; Kubbutat, M.; Aly, A.H.; Proksch, P., Cytotoxic and protein kinase inhibiting nakijiquinones and nakijiquinols from the sponge *Dactylospongia metachromia*. *J. Nat. Prod.* **2014**, *77*, 218-226. [CrossRef]
118. [118] Hwang, I.H.; Oh, J.; Zhou, W.; Park, S.; Kim, J.H.; Chittiboyina, A.G.; Ferreira, D.; Song, G.Y.; Oh, S.; Na, M.; Hamann, M.T., Cytotoxic activity of rearranged drimane meroterpenoids against colon cancer cells via down-regulation of  $\beta$ -catenin expression. *J. Nat. Prod.* **2015**, *78*, 453-461. [CrossRef]
119. Kobayashi, J.I.; Madono, T.; Shigemori, H., Nakijinol, a novel sesquiterpenoid containing a benzoxazole ring from an Okinawan sponge. *Tetrahedron Lett.* **1995**, *36*, 5589-5590. [CrossRef]
120. Simon P. B. Ovenden; Jonathan L. Nielson; Catherine H. Liptrot; Richard H. Willis; Dianne M. Tapiolas; Anthony D. Wright; Motti, C.A., Sesquiterpene benzoxazoles and sesquiterpene quinones from the marine sponge *Dactylospongia elegans*. *J. Nat. Prod.* **2011**, *74*, 65-68. [CrossRef]
121. Wang, J.; Mu, F.R.; Jiao, W.H.; Huang, J.; Hong, L.L.; Yang, F.; Xu, Y.; Wang, S.P.; Sun, F.; Lin, H.W., Meroterpenoids with protein tyrosine phosphatase 1B inhibitory activity from a *Hyrtios* sp. marine sponge. *J. Nat. Prod.* **2017**, *80*, 2509-2514. [CrossRef]
122. Sun, M.; Zhang, X.; Hao, H.; Li, W.; Lu, C., Nocarbenzoxazoles A-G, benzoxazoles produced by halophilic *Nocardiopsis lucentensis* DSM 44048. *J. Nat. Prod.* **2015**, *78*, 2123-2127. [CrossRef]

123. Venkateswarlu, Y.; Srinivasa Reddy, N.; Ramesh, P.; Venkateswara Rao, J., Coisol a bioactive principle from a marine sponge *Oceanapia* sp. *Biocheml. Syst. Ecol.* **1999**, *27*, 519-520. [CrossRef]
124. Rodríguez, I.I.; Rodríguez, A.D., Homopseudopteroxazole, a new antimycobacterial diterpene alkaloid from *Pseudoptergorgia elisabethae*. *J. Nat. Prod.* **2003**, *66*, 855-857. [CrossRef]
125. Rodríguez, A.D.; Ramirez, C.; Rodríguez, I.I.; Gonzalez, E., Novel antimycobacterial benzoxazole alkaloids, from the west Indian sea whip *Pseudoptergorgia elisabethae*. *Org. Lett.* **1999**, *1*, 527-530. [CrossRef]
126. Rodríguez, I.I.; Rodríguez, A.D.; Wang, Y.; Franzblau, S.G., Ileabethoxazole: a novel benzoxazole alkaloid with antimycobacterial activity. *Tetrahedron Lett.* **2006**, *47*, 3229-3232. [CrossRef]
127. Genta-Jouve, G.; Francezon, N.; Puissant, A.; Auberger, P.; Vacelet, J.; Perez, T.; Fontana, A.; Mourabit, A.A.; Thomas, O.P., Structure elucidation of the new citharoxazole from the Mediterranean deep-sea sponge *Latrunculia (Biannulata) citharistae*. *Magn. Reson. Chem. Lett.* **2011**, *49*, 533-536. [CrossRef]
128. Julianti, E.; Lee, J.H.; Liao, L.; Park, W.; Park, S.; Oh, D.C.; Oh, K.B.; Shin, J., New polyaromatic metabolites from a marine-derived fungus *Penicillium* sp. *Org. Lett.* **2013**, *15*, 1286-1289. [CrossRef]
129. Takahashi, Y.; Kubota, T.; Shibazaki, A.; Gono, T.; Fromont, J.; Kobayashi, J., Nakijinamines C-E, new heteroaromatic alkaloids from the sponge *Suberites* species. *Org. Lett.* **2011**, *13*, 3016-3019. [CrossRef]
130. Hohmann, C.; Schneider, K.; Bruntner, C.; Irran, E.; Nicholson, G.; Bull, A.T.; Jones, A.L.; Brown, R.; Stach, J.E.; Goodfellow, M.; Beil, W.; Kramer, M.; Imhoff, J.F.; Sussmuth, R.D.; Fiedler, H.P., Caboxamycin, a new antibiotic of the benzoxazole family produced by the deep-sea strain *Streptomyces* sp. NTK 937. *J. Antibiot.* **2009**, *62*, 99-104. [CrossRef]
131. Dattelbaum, J.D.; Singh, A.J.; Field, J.J.; Miller, J.H.; Northcote, P.T., The nitrogenous hamigerans: unusual amino acid-derivatized aromatic diterpenoid metabolites from the New Zealand marine sponge *Hamigera tarangaensis*. *J. Org. Chem.* **2015**, *80*, 304-312. [CrossRef]
132. Liu, L.L.; Xu, Y.; Han, Z.; Li, Y.X.; Lu, L.; Lai, P.Y.; Zhong, J.L.; Guo, X.R.; Zhang, X.X.; Qian, P.Y., Four new antibacterial xanthenes from the marine-derived actinomycetes *Streptomyces caelestis*. *Mar. Drugs* **2012**, *10*, 2571-2583. [CrossRef]
133. Wakimoto, T.; Tan, K.C.; Abe, I., Ergot alkaloid from the sea slug *Pleurobranchus forskalii*. *Toxicon* **2013**, *72*, 1-4. [CrossRef]
